# Supplementary material for: Effects of Ocean Acidification on Temperate Coastal Marine Ecosystems and Fisheries in the Northeast Pacific
Source: PubMed Central journal article supplement (PMC4324998; doi:10.1371/journal.pone.0117533), 2015-02-11
Supplement: pone.0117533.s002.pdf [file pone.0117533.s002.pdf]

**Table S2.** Experimental details for references in the paper.  $P_{CO_2}$  is presented in units of  $\mu\text{atm}$ . The control variable (usually  $P_{CO_2}$ ) in each experiment is reported based on the manipulation (e.g. the  $P_{CO_2}$  of air in each treatment using the bubbling technique). The carbonate parameters measured within the seawater treatments (regardless of method of manipulation and control variable) are reported. Exposure time: s = seconds, min = minutes, h = hours, d = days, hpf = hours post fertilisation, dpf = days post fertilisation, dph = days post hatching, w = weeks, mo = months, y = years, g = generations. Other detail: S = salinity, I = irradiance,  $\gamma$  = photons, L:D = light:dark regime, T = temperature. n.r. = not reported or not measured.

| Reference                         | Species                                                                                                                                                                                                                                                                                     | Control variable                | Expt.s                                           | Measured carbon      | Exposure time        | Other detail                                                                     |
|-----------------------------------|---------------------------------------------------------------------------------------------------------------------------------------------------------------------------------------------------------------------------------------------------------------------------------------------|---------------------------------|--------------------------------------------------|----------------------|----------------------|----------------------------------------------------------------------------------|
| <b>Phytoplankton</b>              |                                                                                                                                                                                                                                                                                             |                                 |                                                  |                      |                      |                                                                                  |
| Bach <i>et al.</i> 2011 [20]      | <i>Emiliania huxleyi</i> B92/11                                                                                                                                                                                                                                                             | $P_{CO_2}$                      | 20-6000; 40-3700                                 | TA, pH, DIC          | > 1 d                | 15°C                                                                             |
| Bellerby <i>et al.</i> 2008 [77]  | natural assemblage (mesocosm, Bergen)                                                                                                                                                                                                                                                       | $P_{CO_2}$                      | 350, 700, 1050                                   | $P_{CO_2}$ , TA, DIC | 25 d                 |                                                                                  |
| Burkhardt <i>et al.</i> 1999 [83] | <i>Asterionella glacialis</i> , <i>Thalassiosira punctigera</i> , <i>Coscinodiscus wailesii</i> , <i>Phaeodactylum tricornutum</i> , <i>Scrippsiella trochoidea</i>                                                                                                                         | $[CO_2]$ ( $\mu\text{mol/kg}$ ) | 1-38                                             | DIC, TA              | n.r.                 | 15°C, L:D=16:8/24:0, I=150 $\mu\text{mol } \gamma \text{ m}^{-2} \text{ s}^{-1}$ |
| Clark & Flynn 2000 [81]           | <i>Phaeodactylum tricornutum</i> , <i>Thalassiosira pseudonana</i> , <i>Thalassiosira weissflogii</i> , <i>Stichococcus bacillaris</i> , <i>Alexandrium fundyense</i> , <i>Scrippsiella trochoidea</i> , <i>Emiliania huxleyi</i> , <i>Isochrysis galbana</i> , <i>Heterosigma carterae</i> | DIC (mM)                        | 0.25, 0.5, 1, 2                                  | DIC, pH              | 2 growth cycles      | 16°C, L:D=12:12, I=200 $\mu\text{mol } \gamma \text{ m}^{-2} \text{ s}^{-1}$     |
| Delille <i>et al.</i> 2005 [100]  | natural assemblage (mesocosm, Bergen)                                                                                                                                                                                                                                                       | $P_{CO_2}$                      | 180, 370, 700                                    | TA, $P_{CO_2}$       | 25 d                 |                                                                                  |
| Egge <i>et al.</i> 2009 [78]      | natural assemblage (mesocosm, Bergen)                                                                                                                                                                                                                                                       | $P_{CO_2}$                      | 180, 370, 700<br>190, 370, 700<br>375, 750, 1150 | n.r.                 | 25 d<br>25 d<br>25 d | 10-13°C<br>8-10°C<br>9-11.5°C                                                    |
| Engel <i>et al.</i> 2005 [67]     | <i>Emiliania huxleyi</i> (mesocosm, Bergen)                                                                                                                                                                                                                                                 | $P_{CO_2}$                      | 190, 410, 710                                    | $P_{CO_2}$ , TA, pH  | 19 d                 | 10-13°C, I=598 $\mu\text{mol } \gamma \text{ m}^{-2} \text{ s}^{-1}$             |
| Fu <i>et al.</i> 2008 [82]        | <i>Heterosigma akashiwo</i> CCMP2393, <i>Prorocentrum minimum</i> CCMP2233                                                                                                                                                                                                                  | $P_{CO_2}$                      | 375, 750                                         | pH, DIC              | n.r.                 | 20°C, 24°C                                                                       |
| Hare <i>et al.</i> 2007 [85]      | natural assemblage (Bering Sea)                                                                                                                                                                                                                                                             | $P_{CO_2}$                      | 370, 750                                         | n.r.                 | 9-10 d               | 10.4°C, 15°C                                                                     |
| Hein & Sand-Jensen 1997 [79]      | natural assemblage (Atlantic transect)                                                                                                                                                                                                                                                      | $[CO_2]$ ( $\mu\text{M}$ )      | 3, 10, 36, 91                                    | n.r.                 | 2 h                  | ambient T (n.r.)                                                                 |
| Hwang & Lu 2000 [89]              | <i>Alexandrium minimum</i>                                                                                                                                                                                                                                                                  | pH                              | 5.5, 7.5, 8.5                                    | pH                   | 36 d                 | 15°C, L:D=12:12, I=70-80 $\mu\text{mol } \gamma \text{ m}^{-2} \text{ s}^{-1}$   |
| Kim <i>et al.</i> 2013 [87]       | <i>Heterosigma akashiwo</i>                                                                                                                                                                                                                                                                 | $P_{CO_2}$                      | 280, 380, 750                                    | pH, DIC, TA          | 7 d                  | May (10.7°C, S=18.7), Aug (17.9°C, S=10.0)                                       |
| Nielsen <i>et al.</i> 2010 [68]   | natural assemblage (microcosm, Denmark)                                                                                                                                                                                                                                                     | pH                              | 6, 7.6, 7.8, 8                                   | pH, DIC              | 14 d                 |                                                                                  |

Continued on next page

Table S2 – continued from previous page

| Reference                         | Species                                                                                                                                                                                                                                                                                                                                                                                                                                                                                                                              | Control variable           | Expt.s               | Measured carbon             | Exposure time | Other detail                                                                                                           |
|-----------------------------------|--------------------------------------------------------------------------------------------------------------------------------------------------------------------------------------------------------------------------------------------------------------------------------------------------------------------------------------------------------------------------------------------------------------------------------------------------------------------------------------------------------------------------------------|----------------------------|----------------------|-----------------------------|---------------|------------------------------------------------------------------------------------------------------------------------|
| Nimer <i>et al.</i> 1977 [76]     | <i>Skeletonema costatum</i> , <i>Chaetoceros compressus</i> , <i>Melosira</i> sp., <i>Thalassiosira rotula</i> , <i>T. weissfloggi</i> , <i>T. pseudonana</i> , <i>Phaeodactylum tricorutum</i> , <i>Scripsiella trochoidea</i> , <i>Amphidinium carterae</i> , <i>Prorocentrum micans</i> , <i>P. minimum</i> , <i>Glenodinium foliaceum</i> , <i>Chrysochromulina kappa</i> , <i>Gephyrocapsa oceanica</i> , <i>Coccolithus pelagicus</i> , <i>Pleurochrysis carterae</i> , <i>Emiliania huxleyi</i> , <i>Heterosigma akashiwo</i> | DIC (mM)                   | 1, 2                 | TA, pH                      | 10 d          | 15°C, I=200 $\mu\text{mol } \gamma \text{ m}^{-2} \text{ s}^{-1}$                                                      |
| Riebesell <i>et al.</i> 2000 [70] | <i>Emiliania huxleyi</i> (PML B92/11A), <i>Gephyrocapsa oceanica</i> (PC7/1)                                                                                                                                                                                                                                                                                                                                                                                                                                                         | $P_{\text{CO}_2}$          | 280-750              | DIC, TA                     | 7-9 g         | 15°C, S=31, L:D=(16:8, 24:0), I=30-150 $\mu\text{mol } \gamma \text{ m}^{-2} \text{ s}^{-1}$<br>95% light transmission |
| Riebesell <i>et al.</i> 2007 [80] | natural assemblage (mesocosm, Raunefjord, Norway)                                                                                                                                                                                                                                                                                                                                                                                                                                                                                    | $P_{\text{CO}_2}$          | 350, 700 1050        | $P_{\text{CO}_2}$ , TA, DIC | 24 d          |                                                                                                                        |
| Shi <i>et al.</i> 2009 [97]       | <i>Thalassiosira weissflogii</i> (CCMP 1336), <i>Emiliania huxleyi</i> (CCMP 374, PLY M219)                                                                                                                                                                                                                                                                                                                                                                                                                                          | $P_{\text{CO}_2}$ pH       | 380, 750<br>7.8, 8.1 | DIC, TA, pH                 | 4 d           | 20°C, L:D=24:0,<br>I=150 $\mu\text{mol } \gamma \text{ m}^{-2} \text{ s}^{-1}$                                         |
| Sun <i>et al.</i> 2011 [92]       | <i>Pseudo-nitzschia multiseries</i>                                                                                                                                                                                                                                                                                                                                                                                                                                                                                                  | $P_{\text{CO}_2}$          | 220, 400, 730        | pH, DIC                     | 4-6 w         | 17°C                                                                                                                   |
| Tatters <i>et al.</i> 2012 [93]   | <i>Pseudo-nitzschia fraudulenta</i> USCWWA7                                                                                                                                                                                                                                                                                                                                                                                                                                                                                          | $P_{\text{CO}_2}$          | 200, 360, 765        | DIC, pH                     | 4 min         | 16°C                                                                                                                   |
| Tatters <i>et al.</i> 2013 [91]   | <i>Alexandrium catenella</i>                                                                                                                                                                                                                                                                                                                                                                                                                                                                                                         | $P_{\text{CO}_2}$          | 380, 750             | DIC, pH                     | 8 mo          | T=14,19°C, 0.4,2 $\mu\text{m PO}_4^{3-}$<br>on deck expt.                                                              |
| Tortell <i>et al.</i> 2002 [86]   | natural assemblage equatorial Pacific (Peru)                                                                                                                                                                                                                                                                                                                                                                                                                                                                                         | $P_{\text{CO}_2}$          | 150, 750             | pH                          | 3-8 d         |                                                                                                                        |
| Tortell <i>et al.</i> 2008 [84]   | natural assemblage                                                                                                                                                                                                                                                                                                                                                                                                                                                                                                                   | $P_{\text{CO}_2}$          | 100, 380, 800        | pH                          | 10-18 d       | ambient T ( $\sim 1^\circ\text{C}$ )                                                                                   |
| Zondervan <i>et al.</i> 2001 [98] | <i>Emiliania huxleyi</i> (strain PML B92/11)                                                                                                                                                                                                                                                                                                                                                                                                                                                                                         | $\text{CO}_2$              | 5.61, 12.36, 18.45,  | DIC, TA                     | 12 g          | 15°C, L:D=16:8, 24:0,<br>I=150 $\mu\text{mol } \gamma \text{ m}^{-2} \text{ s}^{-1}$                                   |
|                                   | <i>Gephyrocapsa oceanica</i> (strain PC 7/1)                                                                                                                                                                                                                                                                                                                                                                                                                                                                                         | ( $\mu\text{mol L}^{-1}$ ) | 21.32, 27.25         |                             |               |                                                                                                                        |
| <b>Macroalgae</b>                 |                                                                                                                                                                                                                                                                                                                                                                                                                                                                                                                                      |                            |                      |                             |               |                                                                                                                        |
| Asnaghi <i>et al.</i> 2013 [125]  | <i>Corallina elongata</i> , <i>Cystoseira amenitacea</i> , <i>Dictyota dichotoma</i>                                                                                                                                                                                                                                                                                                                                                                                                                                                 | $P_{\text{CO}_2}$          | 390, 550, 750 1000   | TA, pH                      | 1 mo          | 24°C; expt incl. grazing by sea urchins, <i>Paracentrotus lividus</i><br>T=17-20°C                                     |
| Connell & Russell 2010 [131]      | <i>Ecklonia radiata</i> , turf-forming algal species not specified                                                                                                                                                                                                                                                                                                                                                                                                                                                                   | $P_{\text{CO}_2}$          | 380, 550             | TA, pH                      | 14 w          |                                                                                                                        |
| Cornwall <i>et al.</i> 2012 [107] | <i>Corallina officinalis</i> L., <i>Rhodophyllis gunnii</i> Harv., <i>Schizoseris</i> sp., <i>Ulva</i> sp., <i>Undaria pinnatifida</i> Harv.                                                                                                                                                                                                                                                                                                                                                                                         | pH                         | 7.5, 7.9             | TA, pH                      | 5 d           | contrasted acid addition w/<br>bubbling, 12°C                                                                          |
| Gao <i>et al.</i> 1991            | <i>Porphyra yezoensis</i> Ueda                                                                                                                                                                                                                                                                                                                                                                                                                                                                                                       | $P_{\text{CO}_2}$          | 350, 1000, 1600      | –                           | 25 d          | 15°C                                                                                                                   |
| Gao & Zheng 2010 [119]            | <i>Corallina sessilis</i>                                                                                                                                                                                                                                                                                                                                                                                                                                                                                                            | $P_{\text{CO}_2}$          | 380, 1000            | pH, –                       | 31 d          | UV treatments                                                                                                          |
| Hofmann <i>et al.</i> 2012 [113]  | <i>Corallina officinalis</i> , <i>Chondrus crispus</i>                                                                                                                                                                                                                                                                                                                                                                                                                                                                               | $P_{\text{CO}_2}$          | 385, 665, 1486       | pH, TA                      | 86 d          |                                                                                                                        |

Continued on next page

Table S2 – continued from previous page

| Reference                         | Species                                                                                                                                           | Control variable | Expt.s                      | Measured carbon | Exposure time  | Other detail                                 |
|-----------------------------------|---------------------------------------------------------------------------------------------------------------------------------------------------|------------------|-----------------------------|-----------------|----------------|----------------------------------------------|
| Hepburn <i>et al.</i> 2011        | <i>Marginiella boryana</i> , <i>Carpophyllum flexuosum</i> , <i>Cystophora retroflexa</i> , <i>Macrocystis pyrifera</i> , <i>Ecklonia radiata</i> | none             | variable                    | pH              | 24 h           | pH drift experiments                         |
| Hurd <i>et al.</i> 2011 [116]     | <i>Sporolithon durum</i>                                                                                                                          | pH               | 8.11, 7.50                  | pH              | 7 h            | 12°C                                         |
| Israel & Hophy 2002               | <i>Chlorophyta</i> sp., <i>Rhodophyta</i> sp., <i>Phaeophyta</i> sp.                                                                              | $P_{CO_2}$       | ambient, 750                | pH, –           | 5, 28-105 d    |                                              |
| Kubler <i>et al.</i> 1999 [109]   | <i>Lomentaria articulata</i>                                                                                                                      | $P_{CO_2}$       | 235, 350, 700, 1750         | DIC, pH         | 21 d           | 10°C                                         |
| Kuffner <i>et al.</i> 2008 [122]  | Crustose coralline algae, various spp.                                                                                                            | pH               | 7.91-8.17                   | TA, pH          | 51 d           | DIC not stored properly                      |
| Ries <i>et al.</i> 2009 [275]     | <i>Halimeda incrassata</i> , <i>Neogoniolithon</i>                                                                                                | $P_{CO_2}$       | 409, 606, 903, 2856         | –               | 60 d           | 25°C, L:D=10:14, I=21:3-426 W/m <sup>2</sup> |
| Roleda <i>et al.</i> 2012b [112]  | <i>Macrocystis pyrifera</i>                                                                                                                       | pH               | 7.59-8.50                   | TA, pH          | 5, 43 d        | UV treatments                                |
| Swanson & Fox 2007 [111]          | <i>Saccharina latissima</i> , <i>Nereocystis luetkeana</i>                                                                                        | $P_{CO_2}$       | 360, 3000                   | TA, pH          | 55 d           | UV treatments                                |
| <b>Seagrass</b>                   |                                                                                                                                                   |                  |                             |                 |                |                                              |
| Arnold <i>et al.</i> 2012 [140]   | <i>Ruppia maritima</i> , <i>Potamogeton perfoliatus</i>                                                                                           | $P_{CO_2}$       | 158-6792, 244-3465          | $P_{CO_2}$ , pH | Maryland       | two rivers of Chesapeake Bay                 |
| <b>Microzooplankton</b>           |                                                                                                                                                   |                  |                             |                 |                |                                              |
| Aberle <i>et al.</i> 2013 [148]   | natural assemblage (mesocosm, Kongsfjorden, Svalbard)                                                                                             | $P_{CO_2}$       | 175-250, 340-600, 675-1085  | TA, pH          | 29 d           | S=33.9                                       |
| Kim <i>et al.</i> 2010 [151]      | natural assemblage (mesocosm, coastal Korea)                                                                                                      | $P_{CO_2}$       | 400, 900                    | pH              | 20 d           | ambient T(≈11-14°C), ambient + 3°C           |
| Rose <i>et al.</i> 2009 [150]     | natural assemblage (onboard, N. Atlantic)                                                                                                         | $P_{CO_2}$       | 390, 690                    | DIC, pH         | 14 d           | T=12, 16°C                                   |
| Rosol <i>et al.</i> 2013 [149]    | natural assemblage (mesocosm, Kiel Fjord, Germany)                                                                                                | $P_{CO_2}$       | 380, 840, 1120, 1400, 4000  | pH, TA          | 28 d           | 18°C, S=18.1                                 |
| Suffrian <i>et al.</i> 2008 [147] | natural assemblage (mesocosm, Raunefjord, Norway)                                                                                                 | $P_{CO_2}$       | 350, 700, 1050              | n.r.            | 25 d           | 9-11.5°C                                     |
| <b>Mesozooplankton</b>            |                                                                                                                                                   |                  |                             |                 |                |                                              |
| Kurihara <i>et al.</i> 2004 [157] | <i>Acartia steueri</i> , <i>A. erythraea</i>                                                                                                      | $P_{CO_2}$       | 365, 2365, 10365            | $P_{CO_2}$ , pH | 8 d            |                                              |
| Kurihara & Ishimatsu 2008 [159]   | <i>Acartia tsuensis</i>                                                                                                                           | $P_{CO_2}$       | 380, 2380                   | $P_{CO_2}$ , pH | 9 d, 2 g ≈26 d |                                              |
| Mayor <i>et al.</i> 2007 [158]    | <i>Calanus finmarchicus</i> , <i>C. glacialis</i>                                                                                                 | $P_{CO_2}$       | 380, 8000                   | $P_{CO_2}$ , pH | 5 d            |                                              |
| Mayor <i>et al.</i> 2012 [162]    | <i>Calanus helgolandicus</i>                                                                                                                      | $P_{CO_2}$       | 380, 1000                   | $P_{CO_2}$ , pH | 3 d            | 8, 10, 12°C                                  |
| Pedersen <i>et al.</i> 2013 [163] | <i>Calanus finmarchicus</i>                                                                                                                       | $P_{CO_2}$       | 365, 3332, 7281, 9651       | pH, TA          | 28 d           |                                              |
| Weydmann <i>et al.</i> 2012 [160] | <i>Calanus glacialis</i>                                                                                                                          | pH               | 6.9, 7.6, 8.2               | pH              | 7 d            |                                              |
| Vehmaa <i>et al.</i> 2012 [161]   | <i>Acartia biflosa</i>                                                                                                                            | pH               | 7.39-8.13                   | pH              | 5 d + 3 d      | 17, 20°C                                     |
| Zhang <i>et al.</i> 2011 [156]    | <i>Acartia pacifica</i> , <i>A. spinicauda</i> , <i>Calanus sinicus</i>                                                                           | $P_{CO_2}$       | 380, 800, 2000, 5000, 10000 | pH, TA          | 8 d            |                                              |

Continued on next page

Table S2 – continued from previous page

| Reference                           | Species                                                                                                                                          | Control variable       | Expt.s                                               | Measured carbon            | Exposure time            | Other detail                                                                                                                                                            |
|-------------------------------------|--------------------------------------------------------------------------------------------------------------------------------------------------|------------------------|------------------------------------------------------|----------------------------|--------------------------|-------------------------------------------------------------------------------------------------------------------------------------------------------------------------|
| <b>Macrozooplankton – pteropods</b> |                                                                                                                                                  |                        |                                                      |                            |                          |                                                                                                                                                                         |
| Bedharsek <i>et al.</i> 2014        | <i>Limacina helicina</i>                                                                                                                         | $\Omega_{\text{arag}}$ | % of water column saturated                          | DIC, TA                    | USA Pacific coast        | 0 – 200 m depth                                                                                                                                                         |
| Comeau <i>et al.</i> 2009 [175]     | <i>Limacina helicina</i>                                                                                                                         | $P_{\text{CO}_2}$      | 350, 760                                             | TA, pH                     | 2, 4, 6 h                | 5°C                                                                                                                                                                     |
| Comeau <i>et al.</i> 2010 [176]     | <i>Cavolinia inflexa</i>                                                                                                                         | pH                     | 8.1, 7.8, 7.5                                        | TA, pH                     | 5, 13 d                  | 13°C                                                                                                                                                                    |
| Comeau <i>et al.</i> 2012 [177]     | <i>Limacina helicina</i>                                                                                                                         | pH                     | 8.05, 7.90, 7.75                                     | pH, TA                     | 8 d                      | -1.6°C                                                                                                                                                                  |
| Lischka & Riebesell 2012 [170]      | <i>Limacina helicina</i> ,<br><i>Limacina retroversa</i>                                                                                         | $P_{\text{CO}_2}$      | 350, 650<br>880                                      | TA, pH                     | 7 d                      | 2, 7°C                                                                                                                                                                  |
| Maas <i>et al.</i> 2012 [179]       | <i>Hyalocyclis striata</i> , <i>Clio pyramidata</i> ,<br><i>Cavolinia longirostris</i> , <i>Cresis virgula</i> ,<br><i>Diacria quadridentata</i> | $P_{\text{CO}_2}$      | 380, 1000                                            | pH, –                      | 6-18 h                   | 20°C                                                                                                                                                                    |
| Seibel <i>et al.</i> 2012 [178]     | <i>Limacina helicina antarctica</i>                                                                                                              | $P_{\text{CO}_2}$      | 380, 790, 1000                                       | TA, pH                     | 4-13 d                   | -1.8°C                                                                                                                                                                  |
| <b>Molluscs</b>                     |                                                                                                                                                  |                        |                                                      |                            |                          |                                                                                                                                                                         |
| Barros <i>et al.</i> 2013 [200]     | <i>Crassostrea gigas</i>                                                                                                                         | pH                     | 7.37, 7.76, 8.09                                     | pH                         | 2, 3, 4 hpf, 2, 3, 6 dpf | natural hatchery conditions over 64 d                                                                                                                                   |
| Barton <i>et al.</i> 2012 [195]     | <i>Crassostrea gigas</i>                                                                                                                         | –                      | pH 7.6-8.2                                           | $P_{\text{CO}_2}$          | 24 h, 8 d                | 10°C                                                                                                                                                                    |
| Bechmann <i>et al.</i> 2011 [283]   | <i>Mytilus edulis</i>                                                                                                                            | pH                     | 7.61, 8.09                                           | pH, –                      | 64 dpf                   | T=19, 24°C, molecular analyses                                                                                                                                          |
| Clark <i>et al.</i> 2013            | <i>Crassostrea gigas</i>                                                                                                                         | pH                     | 7.5, 7.9                                             | pH                         | 3 mo                     |                                                                                                                                                                         |
| Crim <i>et al.</i> 2011 [204]       | <i>Haliotis kamtschatkana</i>                                                                                                                    | $P_{\text{CO}_2}$      | 400, 800, 1800                                       | $P_{\text{CO}_2}$ , pH, TA | 1-8 dpf                  |                                                                                                                                                                         |
| Dineshram <i>et al.</i> 2012 [211]  | <i>Crassostrea gigas</i>                                                                                                                         | pH                     | 7.5, 8.0                                             | pH, TA                     | 4, 6 dpf                 | proteome analysis                                                                                                                                                       |
| Duckworth & Peterson 2013 [220]     | <i>Argopecten irradians</i> , <i>Clio celata</i>                                                                                                 | pH                     | 7.8, 8.1                                             | pH                         | 133 d                    | T=26, 31°C, sponges boring into dead scallop shells                                                                                                                     |
| Gazeau <i>et al.</i> 2007 [213]     | <i>Crassostrea gigas</i>                                                                                                                         | $P_{\text{CO}_2}$      | 698-2774                                             | pH, TA                     | 2 h                      |                                                                                                                                                                         |
| Ginger <i>et al.</i> 2013 [203]     | <i>Crassostrea gigas</i>                                                                                                                         | pH                     | 7.43, 7.66, 8.03                                     | pH, TA                     | 40 d                     |                                                                                                                                                                         |
| Gobler <i>et al.</i> 2014 [205]     | <i>Argopecten irradians</i>                                                                                                                      | pH                     | Expt. 1: 7.53, 8.00<br>Expt. 2: 7.37 (ambient), 7.92 | pH, DIC                    | 30-40 d                  | Expt. 1: $\text{O}_2 = 37, 260 \mu\text{atm}$ ;<br>Expt. 2: $\text{O}_2 = 140$ (ambient), 260 $\mu\text{atm}$                                                           |
| Havenhand & Schlegel 2009 [198]     | <i>Crassostrea gigas</i>                                                                                                                         | pH                     | 7.82, 8.15                                           | pH, TA                     | 2 min, 1 h               |                                                                                                                                                                         |
| Hettinger <i>et al.</i> 2012 [212]  | <i>Ostrea lurida</i>                                                                                                                             | $P_{\text{CO}_2}$      | 714-1355                                             | pH, TA                     | varied                   | Expt. 1: 11-13 d (larvae) + 7 d (settled), 54 d (juveniles, control $P_{\text{CO}_2}$ );<br>Expt. 2: 13 d (larvae), 13 d (juveniles, same/alternate $P_{\text{CO}_2}$ ) |
| Hettinger <i>et al.</i> 2013 [206]  | <i>Ostrea lurida</i>                                                                                                                             | $P_{\text{CO}_2}$      | 485, 1060                                            | DIC, pH, TA                | 11 d                     | juveniles returned to wild, monitored 4 mo                                                                                                                              |

Continued on next page

Table S2 – continued from previous page

| Reference                                  | Species                                                                                                                                       | Control variable     | Expt.s                                           | Measured carbon  | Exposure time                     | Other detail                                                   |
|--------------------------------------------|-----------------------------------------------------------------------------------------------------------------------------------------------|----------------------|--------------------------------------------------|------------------|-----------------------------------|----------------------------------------------------------------|
| Hettinger <i>et al.</i> 2013 [207]         | <i>Ostrea lurida</i>                                                                                                                          | $P_{CO_2}$           | 520, 1075                                        | DIC, pH, TA      | 11 d                              | low/high food supply                                           |
| Kaplan <i>et al.</i> 2013 [225]            | <i>Doryteuthis pealeii</i>                                                                                                                    | $P_{CO_2}$           | 390, 2200                                        | pH, TA           | 20 d                              | 20°C C, S=30.8, L:D=12:12                                      |
| Kurihara <i>et al.</i> 2007 [201]          | <i>Crassostrea gigas</i>                                                                                                                      | $P_{CO_2}$           | 348, 2268                                        | pH, TA           | 2, 3, 8, 24, 48 h                 |                                                                |
| Lacoue-Labarthe <i>et al.</i> [224]        | <i>Loligo vulgaris</i>                                                                                                                        | $P_{CO_2}$           | 380, 850, 1500                                   | pH, TA           | eggshells 26 d<br>paralarvae 52 h | 16°C, L:D=12:12                                                |
| Lannig <i>et al.</i> 2010 [216]            | <i>Crassostrea gigas</i>                                                                                                                      | $P_{CO_2}$           | 582, 1480                                        | pH, TA           | 26-55 d                           | T=15, 20, 25°C                                                 |
| Mingliang <i>et al.</i> 2011 [214]         | <i>Chlamys farreri</i>                                                                                                                        | pH                   | 6.96, 7.28, 7.58, 7.87, 8.08                     | pH, TA, DIC      | 2 h                               |                                                                |
| O'Donnell <i>et al.</i> 2013 [215]         | <i>Mytilus trossulus</i>                                                                                                                      | $P_{CO_2}$           | 300, 500, 600, 800, 1000, 1100, 1200, 1300, 1500 | pH, TA           | 20 d                              | 10°C, Shellfish Diet 1800                                      |
| Parker <i>et al.</i> 2010 [199]            | <i>Crassostrea gigas</i>                                                                                                                      | $P_{CO_2}$           | 375, 600, 750, 1000                              | pH, TA           | 2 h, 2 dpf, 4 d                   | T=10, 22, 26, 30°C                                             |
| Ries <i>et al.</i> 2009 [275]              | <i>Mercenaria mercenaria</i> , <i>Mytilus edulis</i> ,<br><i>Mya arenaria</i> , <i>Argopecten irradians</i> ,<br><i>Crassostrea virginica</i> | $P_{CO_2}$           | 409, 606, 903, 2856                              | –                | 60 d                              | 25°C C, L:D=10:14, I=213-426<br>W/m <sup>2</sup>               |
| Sanders <i>et al.</i> 2013 [217]           | <i>Pecten maximus</i>                                                                                                                         | $P_{CO_2}$           | 414, 528, 866, 1256                              | pH, TA, DIC      | 82-84 d                           | RNA:DNA ratios                                                 |
| Schalkhauser <i>et al.</i> 2013 [218]      | <i>Pecten maximus</i>                                                                                                                         | $P_{CO_2}$           | 390, 1120                                        | pH, DIC          | 33-60 d                           | T=4, 10°C                                                      |
| Talmage & Gobler 2009 [208]                | <i>Argopecten irradians</i>                                                                                                                   | CO <sub>2</sub> (Pa) | 39, 66, 152                                      | pH, DIC          | 19 d                              |                                                                |
| Talmage & Gobler 2011 [209]                | <i>Argopecten irradians</i>                                                                                                                   | $P_{CO_2}$           | larvae: 240, 387, 773<br>juveniles: 400, 1700    | pH, DIC          | larvae: 20 d<br>juveniles: 45 d   | T=24, 28°C                                                     |
| Talmage & Gobler 2012 [210]                | <i>Argopecten irradians</i>                                                                                                                   | $P_{CO_2}$           | 232, 373, 864                                    | pH, DIC          | 20 d                              | low- & high-bloom brown tide<br>alga, plus control food source |
| Timmins-Schiffman <i>et al.</i> 2013 [202] | <i>Crassostrea gigas</i>                                                                                                                      | $P_{CO_2}$           | 468, 847, 1065                                   | pH, TA           | 1, 3 dpf                          |                                                                |
| Waldbusser <i>et al.</i> 2013 [17]         | <i>Crassostrea gigas</i>                                                                                                                      | $P_{CO_2}$           | 364                                              | pH, $P_{CO_2}$   | 2-19 dpf                          | stable carbon isotope analysis                                 |
| <b>Sponges &amp; Cold-water Corals</b>     |                                                                                                                                               |                      |                                                  |                  |                                   |                                                                |
| Form & Riebesell 2012 [248]                | <i>Lophelia pertusa</i>                                                                                                                       | $P_{CO_2}$           | 509, 605, 856, 981                               | DIC, TA          | 8 d                               | 3 mo acclimation                                               |
| Maier <i>et al.</i> 2009 [247]             | <i>Lophelia pertusa</i>                                                                                                                       | $P_{CO_2}$           | 604, 778, 982<br>ambient (8.1)<br>a-0.15, a-0.3  | DIC, TA<br>pH, – | 178 d<br>1 d                      | acid addition                                                  |
| Ries <i>et al.</i> 2009 [275]              | <i>Oculina arbuscula</i>                                                                                                                      | $P_{CO_2}$           | 409-2856                                         | –                | 60 d                              | 25°C C, L:D=10:14, I=213-426<br>W/m <sup>2</sup>               |
| <b>Echinoderms</b>                         |                                                                                                                                               |                      |                                                  |                  |                                   |                                                                |
| Asnaghi <i>et al.</i> 2013 [125]           | <i>Paracentrotus lividus</i>                                                                                                                  | $P_{CO_2}$           | 390, 550, 750 1000                               | pH, TA           | 1 mo                              | 24°C C, fed calcifying &<br>non-calcifying macroalgae          |

Continued on next page

Table S2 – continued from previous page

| Reference                          | Species                                                                                                                                                                                                                                                                                                              | Control variable | Expt.s                            | Measured carbon | Exposure time                 | Other detail                                               |
|------------------------------------|----------------------------------------------------------------------------------------------------------------------------------------------------------------------------------------------------------------------------------------------------------------------------------------------------------------------|------------------|-----------------------------------|-----------------|-------------------------------|------------------------------------------------------------|
| Asnaghi <i>et al.</i> 2014 [258]   | <i>Paracentrotus lividus</i>                                                                                                                                                                                                                                                                                         | $P_{CO_2}$       | 390, 550, 750 1000                | pH, TA          | 1 mo                          | 22°C, fed calcifying & non-calcifying macroalgae           |
| Clark <i>et al.</i> 2009 [257]     | <i>Triplumeustes gratilla</i> , <i>Pseudechinus huttoni</i> , <i>Evechinus chloroticus</i> , <i>Sterechinus neumayeri</i>                                                                                                                                                                                            | pH               | 6.0, 6.5, 7.0, 7.5, 7.7, 7.8, 8.2 | pH, –           | 4 d                           | T=-1, 10-15, 26°C                                          |
| Dupont <i>et al.</i> 2008 [266]    | <i>Ophiothrix fragilis</i>                                                                                                                                                                                                                                                                                           | pH               | 7.7, 7.9, 8.1                     | pH, TA          | 8 d                           | 14°C, S=32                                                 |
| Dupont <i>et al.</i> 2013 [259]    | <i>Strongylocentrotus droebachiensis</i>                                                                                                                                                                                                                                                                             | $P_{CO_2}$       | 400, 1200                         | pH, TA          | 4 or 16 mo                    | 12°C, fed <i>Ulva</i>                                      |
| Morita <i>et al.</i> 2010 [264]    | <i>Holothuria</i> sp.                                                                                                                                                                                                                                                                                                | pH               | 6.6, 7.3, 7.6, 7.7, 7.8, 8.0      | pH              | 2 s video footage of motility | 27°C, animals held in pH treatment before sperm extraction |
| O'Donnell <i>et al.</i> 2009 [261] | <i>Strongylocentrotus franciscanus</i>                                                                                                                                                                                                                                                                               | $CO_2$           | 380, 540, 970                     | pH, –           | 96 h                          | 15-31°C                                                    |
| Pespeni <i>et al.</i> 2013 [263]   | <i>Strongylocentrotus purpuratus</i>                                                                                                                                                                                                                                                                                 | $P_{CO_2}$       | 400, 900                          | pH, TA          | 7 dpf                         | 14°C                                                       |
| Reuter <i>et al.</i> 2011 [260]    | <i>Strongylocentrotus franciscanus</i>                                                                                                                                                                                                                                                                               | $CO_2$           | 400, 800, 1800                    | pH, TA          | 3 h                           | 7-11°C                                                     |
| Todgham & Hofmann 2009 [262]       | <i>Strongylocentrotus purpuratus</i>                                                                                                                                                                                                                                                                                 | $P_{CO_2}$       | 380, 540, 1020                    | pH, –           | 28, 40, 79 dpf                | 15°C, $O_2 \geq 7.9$ mg/L                                  |
| <b>Crustaceans</b>                 |                                                                                                                                                                                                                                                                                                                      |                  |                                   |                 |                               |                                                            |
| Bechmann <i>et al.</i> 2011 [283]  | <i>Pandalus borealis</i>                                                                                                                                                                                                                                                                                             | pH               | 7.63, 8.13                        | pH, –           | 5 w                           | 5°C                                                        |
| Findlay <i>et al.</i> 2009 [282]   | <i>Semibalanus balanoides</i>                                                                                                                                                                                                                                                                                        | $CO_2$           | 344, 922                          | pH, DIC         | 104 d                         | 10-13°C                                                    |
| Long <i>et al.</i> 2013a [279]     | <i>Paralithodes camtschaticus</i> , <i>Chionoecetes bairdi</i>                                                                                                                                                                                                                                                       | pH               | 7.5, 7.8, 8.0                     | pH, DIC, TA     | 192, 199d,                    | local ambient T and S                                      |
| Long <i>et al.</i> 2013b [280]     | <i>Paralithodes camtschaticus</i>                                                                                                                                                                                                                                                                                    | pH               | 7.7, 8.0                          | pH, DIC         | ~ 2 mo                        | 4.1°C                                                      |
| Pansch <i>et al.</i> 2012 [285]    | <i>Amphibalanus improvisus</i>                                                                                                                                                                                                                                                                                       | $P_{CO_2}$       | 400, 1250, 3250                   | pH, DIC, TA     | 2 mo                          | T=12, 20, 27°C                                             |
| Pansch <i>et al.</i> 2013 [286]    | <i>Amphibalanus improvisus</i>                                                                                                                                                                                                                                                                                       | pH               | 7.6, 7.8, 8.0, 8.1                | pH, TA          | 10 d                          | 20°C                                                       |
| Pansch <i>et al.</i> 2014 [287]    | <i>Amphibalanus improvisus</i>                                                                                                                                                                                                                                                                                       | $P_{CO_2}$       | 400, 1000, 3000                   | pH, TA          | 20 w                          | 10-20°C, altered food availability                         |
| Ries <i>et al.</i> 2009 [275]      | <i>Callinectes sapidus</i> , <i>Homarus americanus</i> , <i>Penaeus plebejus</i> , <i>Littorina littorea</i> , <i>Urosalpinx cinerea</i> , <i>Crepidula fornicata</i> , <i>Strombus alatus</i> , <i>Eucidaris tribuloides</i> , <i>Arbacia punctulata</i> , <i>Hydrodroides crucigera</i> , <i>Euphausia superba</i> | $P_{CO_2}$       | 409, 606, 903, 2856               | –               | 60 d                          | 25°C, L:D=10:14, I=213-426 W/m <sup>2</sup>                |
| Saba <i>et al.</i> 2012 [281]      |                                                                                                                                                                                                                                                                                                                      | $P_{CO_2}$       | 452, 672                          | DIC, TA         | n.r.                          | 0.65°C, onboard incubations                                |
| <b>Fish – Behaviour</b>            |                                                                                                                                                                                                                                                                                                                      |                  |                                   |                 |                               |                                                            |
| Bignami <i>et al.</i> 2013 [310]   | <i>Rachycentron canadum</i>                                                                                                                                                                                                                                                                                          | pH               | 7.4, 7.8, 8.1                     | TA, pH          | 20 d                          | 27°C                                                       |
| Checkley <i>et al.</i> 2009 [307]  | <i>Atractoscion nobilis</i>                                                                                                                                                                                                                                                                                          | $P_{CO_2}$       | 380, 993, 2558                    | TA, DIC         | 7-8 d                         | 18°C                                                       |
| Cripps <i>et al.</i> 2011 [319]    | <i>Pseudochromis fuscus</i>                                                                                                                                                                                                                                                                                          | $P_{CO_2}$       | 44-451, 607-630, 925-949          | TA, pH          | 4-7 d                         | 27-28°C                                                    |
| Dixson <i>et al.</i> 2010 [311]    | <i>Amphiprion percula</i>                                                                                                                                                                                                                                                                                            | $P_{CO_2}$       | control?, 1050                    | pH              | 11 d                          | 30°C                                                       |
| Dixson <i>et al.</i> 2014 [322]    | <i>Mustelus canis</i>                                                                                                                                                                                                                                                                                                | $P_{CO_2}$       | 405, 740, 1060                    | pH, TA          | 5 d                           | 20°C                                                       |

Continued on next page

Table S2 – continued from previous page

| Reference                         | Species                                                                                                                              | Control variable         | Expt.s                                                                                                                       | Measured carbon  | Exposure time           | Other detail             |
|-----------------------------------|--------------------------------------------------------------------------------------------------------------------------------------|--------------------------|------------------------------------------------------------------------------------------------------------------------------|------------------|-------------------------|--------------------------|
| Domenici <i>et al.</i> 2012 [317] | <i>Neopomacentrus azyron</i>                                                                                                         | $P_{CO_2}$               | 441,880                                                                                                                      | TA, pH           | 4 d                     | 28°C                     |
| Ferrari <i>et al.</i> 2011 [318]  | <i>Pseudochromis fuscus</i> , <i>Pomacentrus moluccensis</i> , <i>P. amboinensis</i> , <i>P. nagasakiensis</i> , <i>P. chrysurus</i> | $P_{CO_2}$               | 441, 718, 880                                                                                                                | TA, pH           | 4 d                     | 28°C                     |
| Ferrari <i>et al.</i> 2012 [312]  | <i>Pomacentrus amboinensis</i>                                                                                                       | $P_{CO_2}$               | 441, 718, 880                                                                                                                | TA, pH           | 4 d                     | 28°C                     |
| Ferrari <i>et al.</i> 2012 [316]  | <i>Pomacentrus amboinensis</i>                                                                                                       | $P_{CO_2}$               | 330, 991                                                                                                                     | TA, $P_{CO_2}$   | 20-23, 40-43 d          | 18°C                     |
| Jutfelt <i>et al.</i> 2013 [320]  | <i>Gasterosteus aculeatus</i>                                                                                                        | $P_{CO_2}$               | 367, 1882, 4257                                                                                                              | ?                | 7-46 d                  | 5-10°C                   |
| Maneja <i>et al.</i> 2013 [308]   | <i>Gadus morhua</i>                                                                                                                  | $P_{CO_2}$               | 359-373, 1810-1957,                                                                                                          | TA, DIC          | 12, 27 d                | 5-10°C                   |
| Maneja <i>et al.</i> 2013 [321]   | <i>Gadus morhua</i>                                                                                                                  | $P_{CO_2}$               | 4026-4170                                                                                                                    |                  |                         |                          |
| Melzner <i>et al.</i> 2009 [295]  | <i>Gadus morhua</i>                                                                                                                  | $P_{CO_2}$               | 523-533, 3050, 5749                                                                                                          | DIC, pH          | 4-12 min                | 5°C                      |
| Munday <i>et al.</i> 2009 [314]   | <i>Amphiprion percula</i>                                                                                                            | $P_{CO_2}$               | 390, 1050, 1710                                                                                                              | $P_{CO_2}$       | 11 d                    | 30°C                     |
| Munday <i>et al.</i> 2010 [313]   | <i>Amphiprion percula</i> , <i>Pomacentrus wardi</i>                                                                                 | $P_{CO_2}$               | 390, 541, 699, 863                                                                                                           | $P_{CO_2}$       | 1-10 d                  | 28-30°C                  |
| Munday <i>et al.</i> 2011 [309]   | <i>Amphiprion percula</i>                                                                                                            | $P_{CO_2}$               | 404, 1050, 1721                                                                                                              | TA, pH           | 11 d                    | 30°C                     |
| Nilsson <i>et al.</i> 2012 [323]  | <i>Amphiprion percula</i>                                                                                                            | $P_{CO_2}$               | 452, 945                                                                                                                     | TA, pH           | 11 d                    | 29°C                     |
| Simpson <i>et al.</i> 2011 [315]  | <i>Neopomacentrus azyron</i><br><i>Amphiprion percula</i>                                                                            | $P_{CO_2}$<br>$P_{CO_2}$ | 440, 880<br>391, 613, 718, 876                                                                                               | TA, pH<br>TA, pH | 4 d<br>17, 20, 24, 36 d | 28°C<br>30°C             |
| <b>Fish – Development</b>         |                                                                                                                                      |                          |                                                                                                                              |                  |                         |                          |
| Baumann <i>et al.</i> 2012 [306]  | <i>Menidia beryllina</i>                                                                                                             | $P_{CO_2}$               | Ex 1: 390, 1050<br>Ex 2: 390, 650, 810,<br>1070<br>Ex 3: 410, 780<br>Ex 4: 390, 890                                          | DIC, pH          | 7 dph                   | 24°C, $O_2=8\text{mg/L}$ |
| Franke & Clemmesen 2011 [305]     | <i>Clupea harengus</i>                                                                                                               | $P_{CO_2}$               | 480, 1260, 1859,<br>2626, 2903, 4635                                                                                         | pH               | ~8 d                    | 12°C, S=14, L:D=12:12    |
| Frommel <i>et al.</i> 2010 [304]  | <i>Gadus morhua</i>                                                                                                                  | $P_{CO_2}$               | 380, 1400                                                                                                                    | pH               | 10 s                    | 9.4°C                    |
| Frommel <i>et al.</i> 2012 [300]  | <i>Gadus morhua</i>                                                                                                                  | $P_{CO_2}$               | 380, 1800, 4200                                                                                                              |                  | 7 w                     | 2300-L mesocosms         |
| Hurst <i>et al.</i> 2013 [303]    | <i>Theragra chalcogramma</i>                                                                                                         | $P_{CO_2}$               | Ex 1: 310, 475, 828,<br>1933<br>Ex 2: 287, 457, 805,<br>1773<br>Ex 3: 293, 411, 910,<br>1812<br>Ex 4: 297, 426, 941,<br>1858 | DIC, TA          | 5-38 dph                | 8°C                      |

Continued on next page

Table S2 – continued from previous page

| Reference                        | Species             | Control variable      | Expt.s               | Measured carbon       | Exposure time | Other detail                 |
|----------------------------------|---------------------|-----------------------|----------------------|-----------------------|---------------|------------------------------|
| Kikkawa <i>et al.</i> 2004 [301] | <i>Pagrus major</i> | pH<br>CO <sub>2</sub> | 5, 9, 6, 2<br>5, 10% | pH<br>CO <sub>2</sub> | 10-12 dph     | 20°C, O <sub>2</sub> =20.95% |
